# Supplementary material for: Cooperative Clamp-Mediated Promoter Recognition by Poxviral RNAP and Its TBP/TFIIB-Like Partner
Source: Research Square preprint supplement (doi:10.21203/rs.3.rs-7417495/v1), 2025-09-11
Supplement: Supplementary file 1 [file 1b233c7e3a7d1561db8e02ee.xlsx]

## Sheet: Sheet1
Replicate 1
30.06.23 - 28 h
		Signal intensity	applied V [µl]	adjusted Signal intensity	signal intensity normalized on 100%
int	input	8588945	5	17177890
	supernatant	474042	2.5	1896168	24.5122
	IP	5839439	10	5839439	75.4878
early	input	10013560	5	20027120
	supernatant	1021790	2.5	4087160	85.2132
	IP	709234	10	709234	14.7868
T7	input	8725296	5	17450592
	supernatant	14251924	2.5	57007696	99.7558
	IP	139556	10	139556	0.244204
Replicate 2
25.07.23 - 5 h
		raw data	V(sup) [µl]	adjusted Signal intensity	signal intensity normalized on 100%
int	input	9113894	3	1.21519e+07
	supernatant	459820	3	613093	4.72224
	IP	12370007	4	12370007	95.2778
early	input	15479300	3	2.06391e+07
	supernatant	5007146	3	6.67619e+06	68.2697
	IP	3102953	4	3102953	31.7303
T7	input	34879300	3	4.65057e+07
	supernatant	47396886	3	63195848	99.6535
	IP	219749	4	219749	0.346522
Replicate 3-I
25.07.23 - 5 h
		raw data	V(sup) [µl]	adjusted Signal intensity	signal intensity normalized on 100%
int	input	5099681	5	4.07974e+06
	supernatant	199749	4	199749	2.5323
	IP	7688309	4	7688309	97.4677
T7	input	22379622	5	1.79037e+07
	supernatant	47910300	4	47910300	99.6154
	IP	184991	4	184991	0.384634
Replicate 3-II
27.07.23 - 26 h
		raw data	V(sup) [µl]	adjusted Signal intensity	signal intensity normalized on 100%
early	input	28725401	8	28725401
	supernatant	17556037	5	2.80897e+07	74.5369
	IP	9595924	8	9595924	25.4631
T7	input	57318120	8	57318120
	supernatant	84176253	5	1.34682e+08	98.0674
	IP	2654196	8	2654196	1.93263
Visualized via OriginPro
